# Supplementary material
Source: PubMed Central journal article supplement (PMC3957974)
Supplement: IAI.01067-13_zii999090546so7.pdf [file IAI.01067-13_zii999090546so7.pdf]

## 1 **Supplemental Material Legend**

2 In the following movies, images were acquired with a 40X objective every 20 s for a total of  
3 980 s (245 x real time).

4 **Movie S1.** Phase contrast movie of HepG2 cells incubated at 37°C in standard medium (M1)  
5 and exposed to 1 nM LLO in the presence of 20 μM PI.

6 **Movie S2.** Fluorescence movie of HepG2 cells incubated at 37°C in standard medium (M1)  
7 and exposed to 1 nM LLO in the presence of 20 μM PI.

8 **Movie S3.** Phase contrast movie of HepG2 cells incubated at 37°C in Ca<sup>2+</sup>-free medium(M2)  
9 and exposed to 1 nM LLO in the presence of 20 μM PI.

10 **Movie S4.** Fluorescence movie of HepG2 cells incubated at 37°C in Ca<sup>2+</sup>-free medium (M2)  
11 and exposed to 1 nM LLO in the presence of 20 μM PI.

12 **Movie S5.** Phase contrast movie of HepG2 cells incubated at 37°C in high K<sup>+</sup> medium (M3)  
13 and exposed to 1 nM LLO in the presence of 20 μM PI.

14 **Movie S6.** Fluorescence movie of HepG2 cells incubated at 37°C in high K<sup>+</sup> medium (M3)  
15 and exposed to 1 nM LLO in the presence of 20 μM PI.

16
